# Supplementary material for: Modulating the hydration behaviour of calcium chloride by lactam complexation
Source: Royal Society of Chemistry journal article supplement (doi:10.1039/c6dt02296k), 2016-01-01
Supplement: c6dt02296k1.pdf [file c6dt02296k1.pdf]

## Modulating the Hydration Behaviour of Calcium Chloride by Lactam Complexation

Andrea Perrin,<sup>a</sup> Osama M. Musa<sup>b</sup> and Jonathan W. Steed<sup>a\*</sup>

- a) *Department of Chemistry, Durham University, South Road, Durham DH1 3LE, UK. Email: jon.steed@durham.ac.uk*
- b) *Ashland Inc., 1005 Route 202/206, Bridgewater, NJ 08807, USA. E-mail: omusa@ashland.com*

### SUPPLEMENTARY INFORMATION

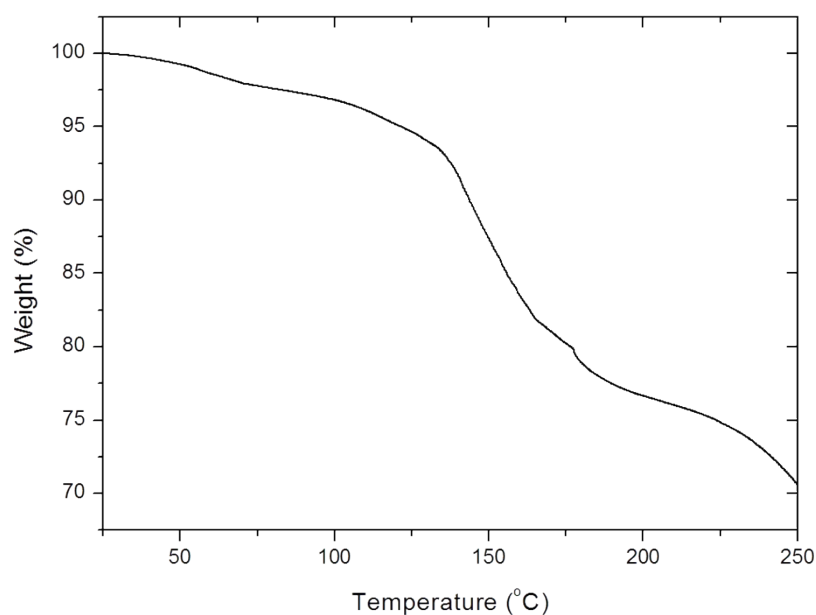

Figure S1. Thermogravimetric trace for  $\{[\text{Ca}(\mu\text{-L1})(\text{H}_2\text{O})_5]\text{Cl}_2\cdot\text{H}_2\text{O}\}_n$  (**2**).

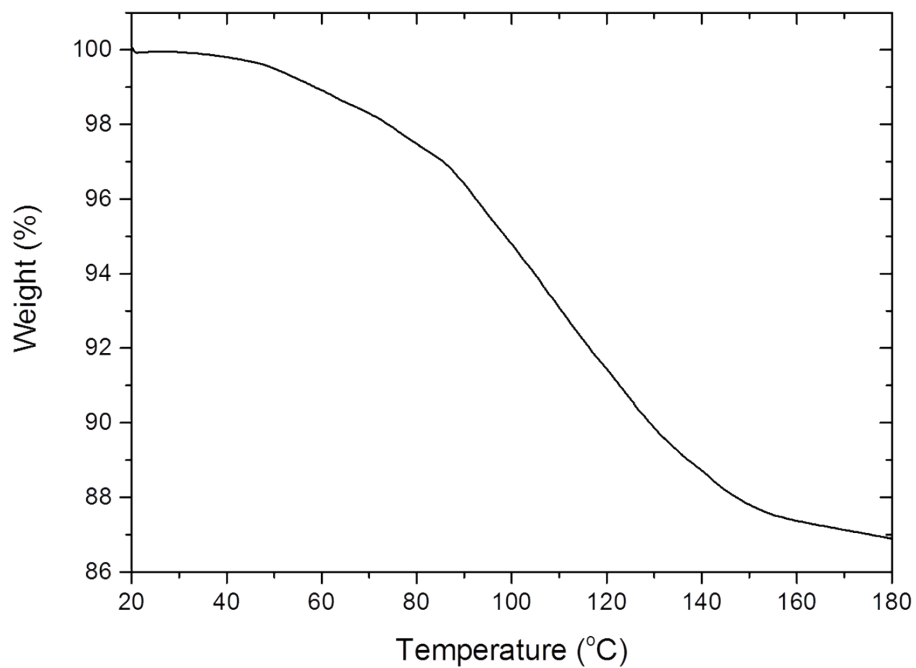

Figure S2. Thermogravimetric trace for the mechanochemically prepared product of reaction of CaCl<sub>2</sub> with ligand L1. Product was previously dried at 70 °C for 3 hours.

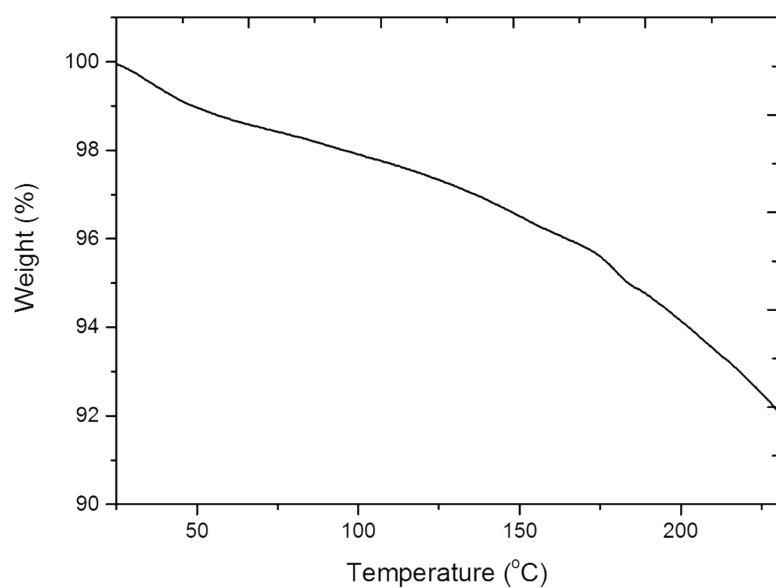

Figure S3. Thermogravimetric trace for the ethanol solvate {[CaCl<sub>2</sub>(L2)(EtOH)]<sub>n</sub> (4).

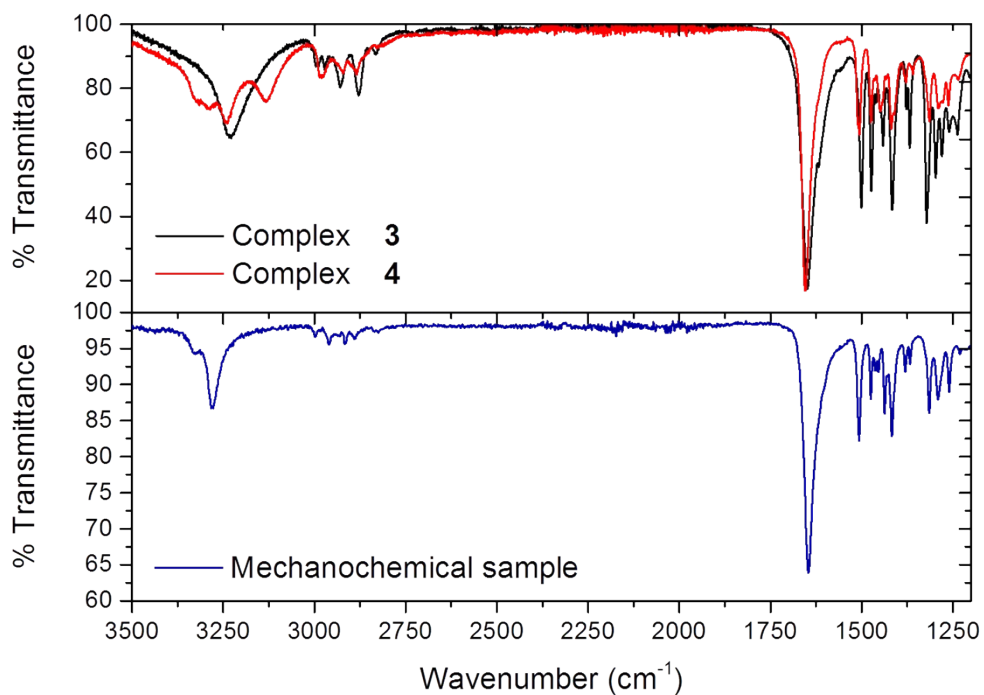

Figure S4. IR spectra for complexes **3** and **4** in comparison to the mechanochemically prepared sample.

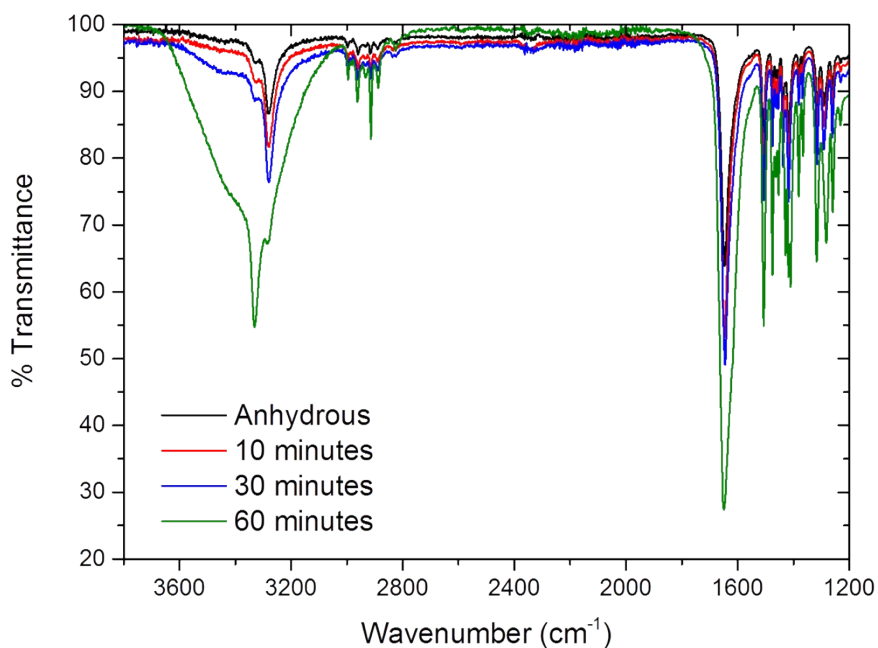

Figure S5. Overlaid IR spectra for the anhydrous mechanochemically prepared complex of CaCl<sub>2</sub> and ligand L2 following removal from the oven (110 °C).
